# Supplementary material for: S1P Lyase Regulates Intestinal Stem Cell Quiescence via Ki-67 and FOXO3
Source: MDPI journal article supplement (doi:10.3390/ijms22115682), 2021-05-26
Supplement: s1 [file s1]

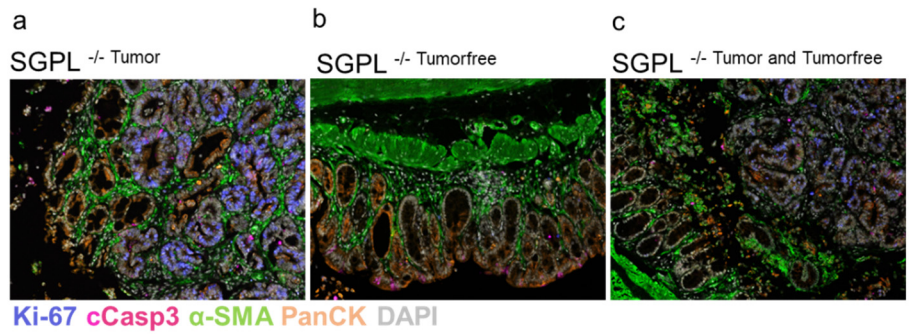

**Figure S1.** Multi-color staining of (a) SGPL1<sup>-/-</sup> tumor tissue, (b) SGPL1<sup>-/-</sup> tumor-free tissue and (c) SGPL1<sup>-/-</sup> tissue with tumor-free and tumor areas (magnification 40 $\times$ ).

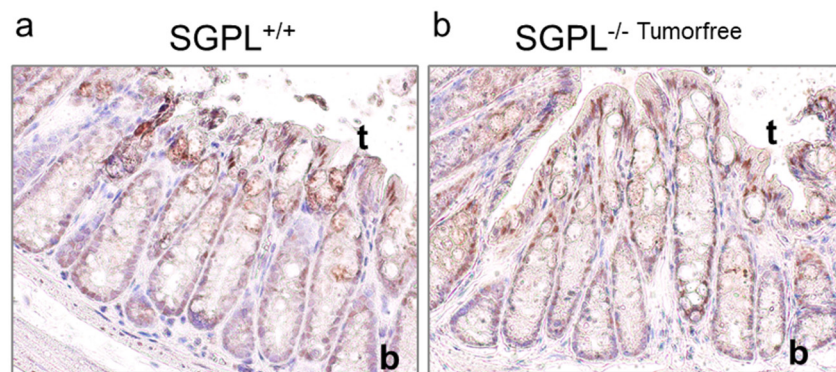

**Figure S2.** Anti-FOXO3a staining of a) wildtype (SGPL1<sup>+/+</sup>) and b) SGPL1 knockout (SGPL1<sup>-/-</sup>) colon sections (magnification 40 $\times$ ); in image: t = crypt tip; b = crypt bottom.

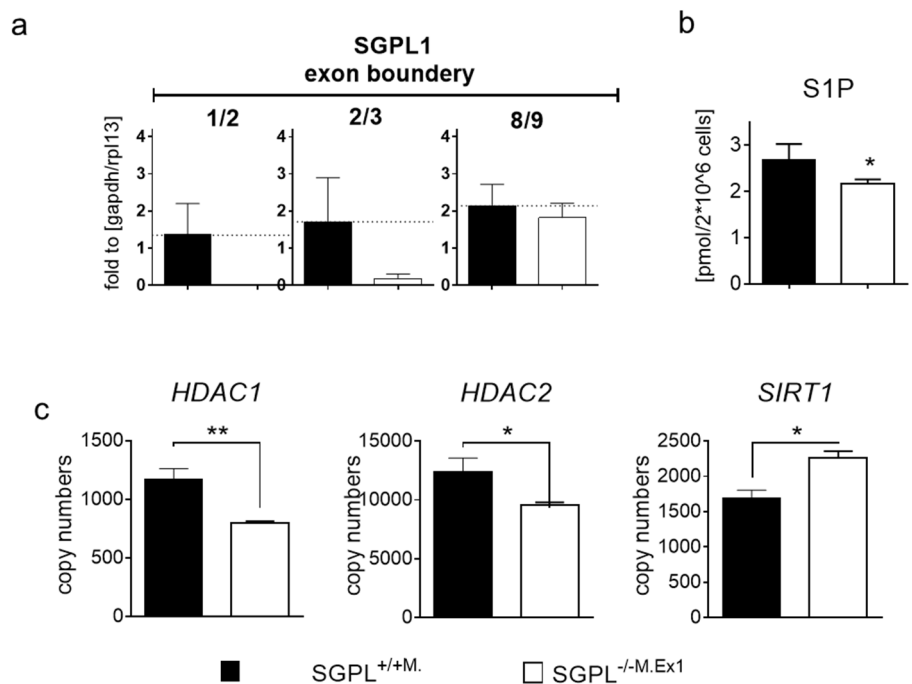

**Figure S3.** (a) SGPL1 mRNA expression targeted by different primers for exon boundaries 1/2, 2/3 and 8/9; (b) S1P quantification via MS/MS, (d) transcriptome analysis of SGPL1<sup>+/+M</sup> and SGPL1<sup>-/-M.Ex1</sup> cells.
